# Supplementary material
Source: PubMed Central journal article supplement (PMC6304045)
Supplement: rspb20182251supp1.pdf [file rspb20182251supp1.pdf]

# 1 **Supplementary Materials**

## 2 **Appendix 1. Calculation of Reynolds number of a rectangular duct.**

3 Reynolds number ( $Re$ ) is a dimensionless quantity in fluid dynamics that indicates how moving  
4 fluids behave in different flow situations [1]. It indicates whether the flow around an object or  
5 within a duct is laminar or turbulent. In a rectangular duct, the flow is laminar when  $Re < 2300$   
6 and turbulent when  $Re > 4000$ .  $Re$  is defined as the ratio of inertial to viscous (frictional) forces  
7 of a fluid and is commonly expressed as:

$$8 \quad Re = \frac{\mu L}{\nu}$$

9 where  $\mu$  is the velocity of the fluid (m/s),  $L$  is a characteristic linear dimension (m; see below),  
10 and  $\nu$  is the kinematic viscosity of the fluid (m<sup>2</sup>/s). For a duct,  $L$  represents the “hydraulic  
11 diameter” which for a rectangular cross-sectional area is given by:

$$12 \quad L = \frac{2ab}{(a + b)}$$

13 where  $a$  and  $b$  are the width and height of the duct, respectively.

14 In our wind tunnel,  $a = 0.178$  m and  $b = 0.254$  m. At low velocity,  $\mu_L = 1.5$  m/s and at high  
15 velocity,  $\mu_H = 5.0$  m/s. We determined  $\nu = 15.15 \times 10^{-6}$  m<sup>2</sup>/s for 21° C, the temperature of our  
16 lab, using an online tool (The Engineering ToolBox, [https://www.engineeringtoolbox.com/air-absolute-kinematic-viscosity-d\\_601.html](https://www.engineeringtoolbox.com/air-absolute-kinematic-viscosity-d_601.html)). Using these values, we calculated  $Re \sim 20\,000 - 70$   
17  $000$ , which indicates that the flow was turbulent.  
18

19

20 1. Niklas KJ. 1992 *Plant biomechanics: an engineering approach to plant form and function*.

21 Chicago, IL, USA: University of Chicago Press.

22

23 **Figure 1.** Representative examples of flowers with high (left) and low (right) natural frequency  
24 stamens. Flowers were stored in 60% ethanol and photographed using a dissection microscope.

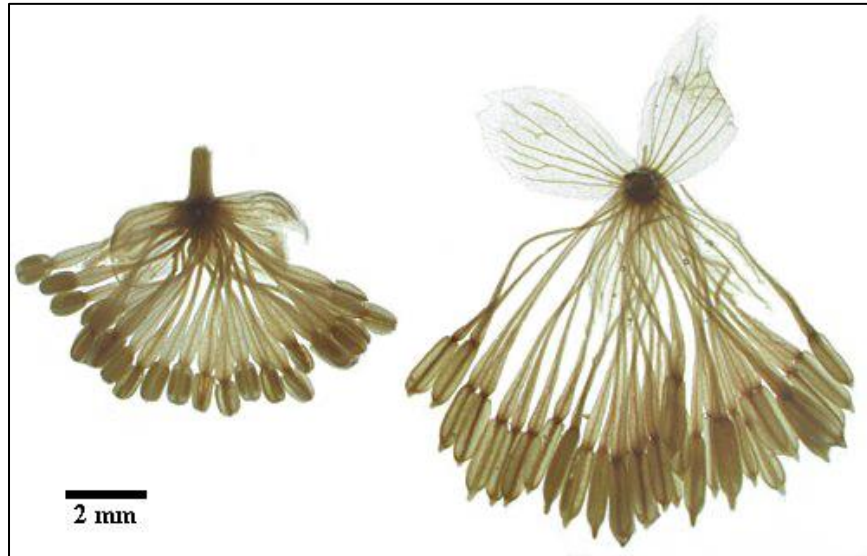

25

26

27 **Figure 2.** Geographical locations of populations of *Thalictrum pubescens* (filled circles) that  
28 were sampled in Ontario for this study.

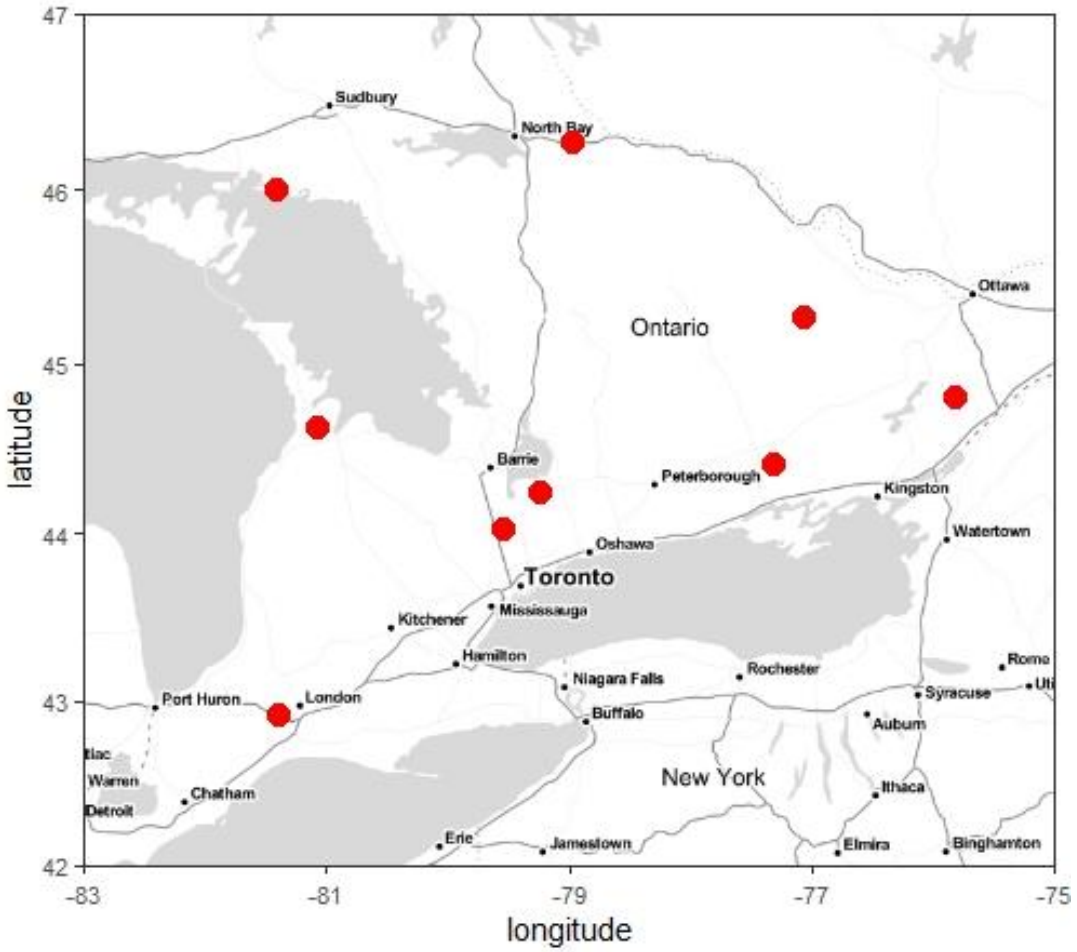

29

30

31 **Figure 3.** Frequency spectra for stamens of *Thalictrum pubescens* in the wind tunnel assay. Solid  
32 lines in each panel represents the ensemble average spectrum for a particular genotype. The  
33 genotypes are arranged in order from lowest to highest natural frequency measured using the  
34 electrodynamic shaker (see Methods).

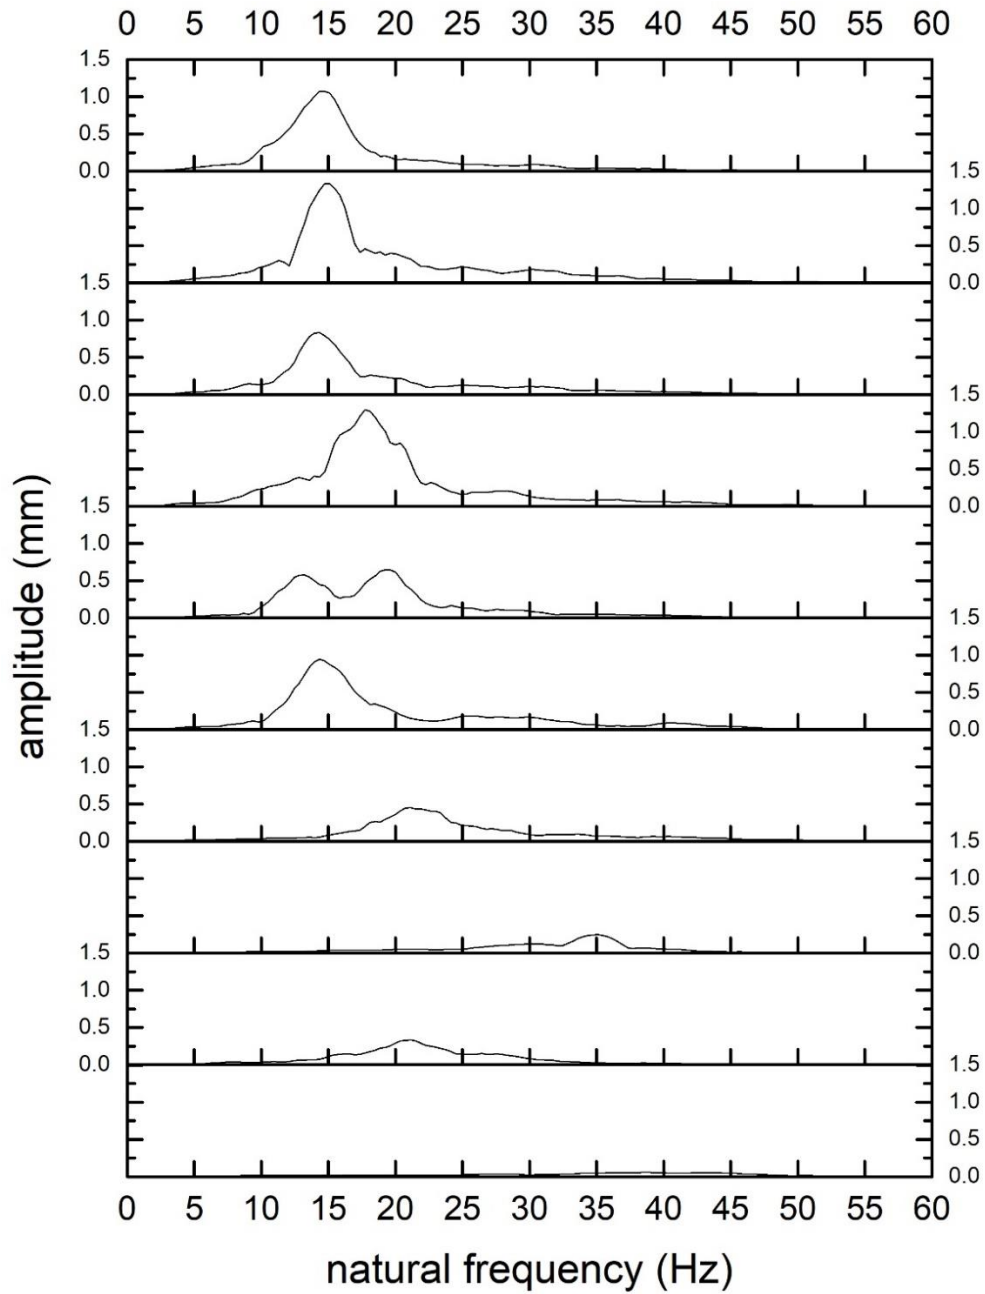

35

36

37 **Table 1.** Summary statistics of linear mixed model describing variation in stamen natural  
 38 frequency of *Thalictrum pubescens* plants over three consecutive years (2015 to 2017) with data  
 39 grouped by genotype.

|                           | natural frequency |                |          |                        |
|---------------------------|-------------------|----------------|----------|------------------------|
|                           | coefficient       | standard error | <i>t</i> | <i>P</i> (> <i>t</i> ) |
| <i>fixed effects</i>      |                   |                |          |                        |
| Intercept                 | -370.83           | 1338.40        | -0.27    | 0.784                  |
| Year                      | 0.19              | 0.66           | 0.29     | 0.774                  |
| <i>random effects</i>     |                   |                |          |                        |
| variance within genotypes |                   | 12.43          |          |                        |
| variance among genotypes  |                   | 12.48          |          |                        |
| intraclass correlation    |                   | 0.503          |          |                        |

40

41

42 **Table 2.** Analysis of deviance to determine the effect of male flower number (male flowers),  
 43 stamen natural frequency (frequency) and pollinator availability (pollination) on percent seed set  
 44 in *Thalictrum pubescens*.

|                         | d.f. | deviance | resid d.f. | resid deviance | <i>F</i> | <i>P</i> (> <i>F</i> ) |
|-------------------------|------|----------|------------|----------------|----------|------------------------|
| Null                    |      |          | 27         | 1020.83        |          |                        |
| Male flowers            | 1    | 411.41   | 26         | 609.43         | 19.34    | < 0.0001 ***           |
| Frequency               | 1    | 27.01    | 25         | 582.42         | 1.27     | 0.27                   |
| Pollination             | 1    | 7.67     | 24         | 574.74         | 0.36     | 0.55                   |
| Frequency x Pollination | 1    | 129.42   | 24         | 445.32         | 6.08     | 0.02 *                 |

45  
 46 \*, \*\*\*: Significant by the *F*-test to 5% and 1% respectively; d.f. degrees of freedom; resid d.f.  
 47 residual degrees of freedom; resid deviance residual deviance.

48

49
